# Supplementary material for: Continuous Influx of Genetic Material from Host to Virus Populations
Source: PLOS journal article supplement (doi:10.1371/journal.pgen.1005838), 2016-02-01
Supplement: S7 (10.1371/journal.pgen.1005838.s007) [file journal.pgen.1005838.s007]

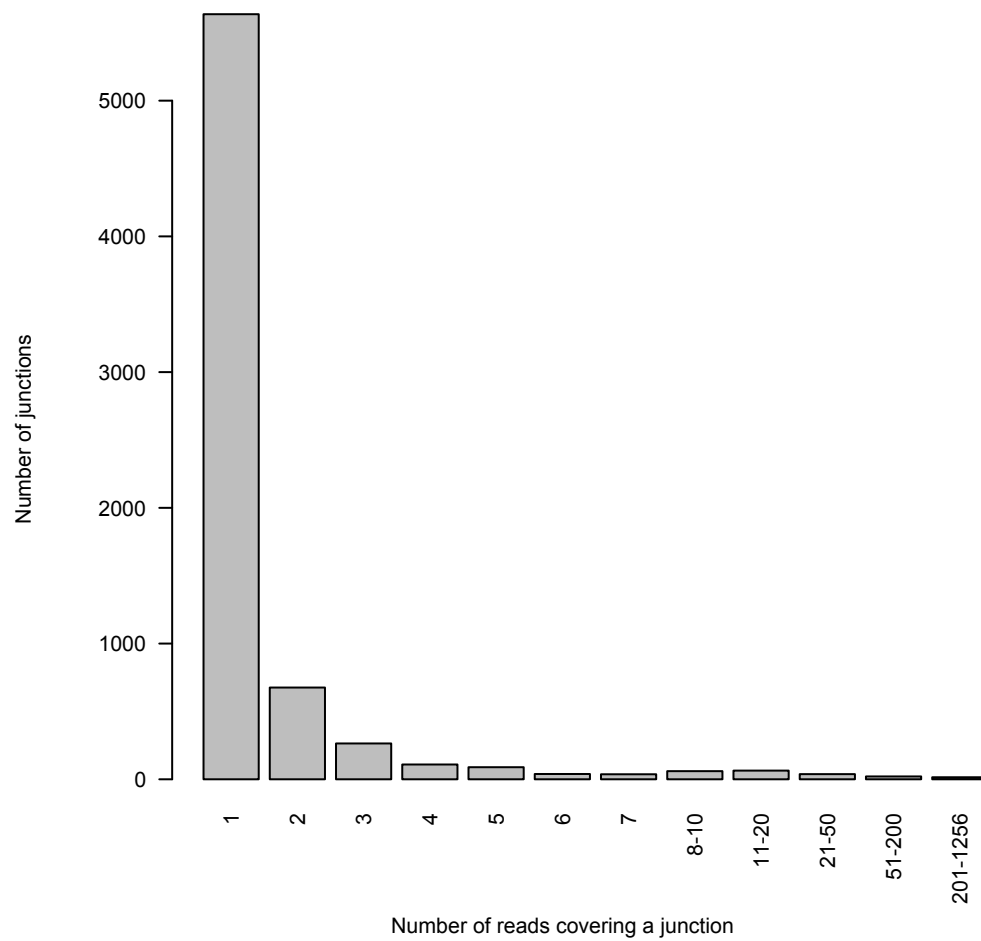

**Fig. S2. Distribution of the number of reads covering a given junction.**

While most of the junctions (5,637) are covered by one read, 1412 are covered by more two to 1,256 reads.
